1 Title: Hybridization potential between *Amaranthus tuberculatus* and *Amaranthus albus*

2

3 Authors: Brent P Murphy, Laura A Chatham, Danielle M McCormick, Patrick J Tranel

4

5 Affiliations: Department of Crop Sciences, University of Illinois, Urbana, Illinois, USA

6

7 Corresponding author: Patrick J Tranel ([tranel@illinois.edu](mailto:tranel@illinois.edu)) 1201 W. Gregory Dr., Urbana, IL

8 61801

9

10 Running title: Hybridization of *A. tuberculatus* and *A. albus*

11

12 Keywords: *Amaranthus tuberculatus*, *Amaranthus albus*, interspecific hybridization, apomixis,  
13 auto-pollination,

14

15 Word count: 3,020

16 Number of figures: 1

17 Number of tables: 3

18 List of online appendix items: Supplementary Figure 1, Supplementary Figure 2

19 Abstract

20 The genus *Amaranthus* is composed of numerous annual herbs, several of which are primary driver  
21 weeds within annual production agricultural systems. In particular, *Amaranthus tuberculatus*, a  
22 dioecious species, is noteworthy for rapid growth rates, high fecundity, and an expanding  
23 geographic distribution. Interspecific hybridization within and between the subgenera *Amaranthus*  
24 and *Acnidia* is reported both in controlled environment and field studies, however a gap in  
25 knowledge exists with the subgenus *Albersia*. Interspecific hybridization may contribute to genetic  
26 diversity, and may contribute to the current range expansion of *A. tuberculatus*. Recently, a  
27 herbicide resistance survey of *A. tuberculatus* across five Midwestern states reported alleles of  
28 *PPX2* similar to sequences of *Amaranthus albus*, a monoecious species. Here, we seek to generate  
29 empirical data for the hybridization potential of *A. albus* and *A. tuberculatus* through replicated,  
30 controlled crosses in a greenhouse. Of 65,000 progeny screened from *A. albus* grown with *A.*  
31 *tuberculatus* males, three were confirmed as hybrids. Hybrids were dioecious, possessed  
32 phenotypic traits of both species, and had limited to no fertility. DNA content analysis of backcross  
33 progeny suggested a polyploid state may be required for hybrid formation. Screening of 120  
34 progeny of *A. tuberculatus* females grown with *A. albus* identified no hybrids, though a skew to  
35 female progeny was observed. The female skew may be due to apomixis or auto-pollination, the  
36 spontaneous generation of male flowers on otherwise female plants. Our results indicate that  
37 introgression between *A. albus* and *A. tuberculatus* will occur less frequently than what has often  
38 been reported from hybridization studies with different pairs of *Amaranthus* species.

39 Introduction

40

41 The genus *Amaranthus* is composed of numerous successful annual herbs of ruderal habitats.  
42 *Amaranthus* species are globally distributed, and several have naturalized throughout the world as  
43 a result of human-mediated seed flow (Sauer 1967). While much of the interest in the genus is a  
44 result of the prevalence and impact of certain species on agricultural production, they are also  
45 important components of native ecosystems (Steckel et al. 2004; Culpepper et al. 2006; Tranel et  
46 al. 2011). Within the context of annual production agricultural systems, *Amaranthus tuberculatus*  
47 and *A. palmeri* are particularly noteworthy (Tranel et al. 2011; Ward et al. 2013). These two species  
48 are both dioecious and they possess rapid growth rates, high fecundity, and expanding ranges. The  
49 factors that facilitate the expansion of these species have not been fully characterized, though range  
50 expansion is likely facilitated by herbicide resistance traits evolved within these species.

51

52 A primary selection pressure within conventional croplands is herbicides. For example, Benbrook  
53 (2016) predicted that in 2014, the total use of glyphosate within the US corresponded to 1 kg ae  
54 ha<sup>-1</sup> of cropland within the country. In contrast, a typical field use rate for a single application can  
55 be considered to be 840 g ae ha<sup>-1</sup>, equating to over one labelled application per hectare cropland  
56 (Murphy et al. 2019). The establishment of resistant populations may both exclude native species  
57 from these habitats, and also provide a source of resistance traits to related species through  
58 hybridization. Furthermore, gene flow from these native, related species may transfer adaptive  
59 traits to the invading plants, facilitating establishment and local adaptation (Arnold 2004; Suarez-  
60 Gonzalez et al. 2018). Therefore, the adaptive potential of the gene pool, not simply a species,  
61 must be considered to predict range expansions.

62

63 Considerable genetic diversity exists within the *Amaranthus* genus, as illustrated by the naturalized  
64 range of member species. *Amaranthus retroflexus* is perhaps the most widely distributed, where  
65 the species is considered naturalized world-wide (Sauer 1967). However, most Amaranths inhabit  
66 a more narrow range. *Amaranthus tuberculatus* was historically confined to the American Midwest  
67 and Mississippi River basin (Costea et al. 2005). However, recent expansions of weedy biotypes  
68 of the species have been reported in a global and regional scale, mediated both through the direct  
69 invasion of a given biotype and the adaptive introgression of weedy traits into native, largely non-  
70 weedy gene pools (Milani et al. 2020; Kreiner et al. 2019).

71

72 Hybridization across species boundaries is well documented within *Amaranthus*. A pertinent  
73 example is glyphosate resistant *Amaranthus spinosus* observed in Mississippi (Nandula et al.  
74 2014). Hybridization with *A. palmeri* allowed the transfer and introgression of the glyphosate  
75 resistance trait into *A. spinosus*. While modern phylogenies place *A. palmeri* and *A. spinosus* as  
76 neighbors, hybridization within *Amaranthus* does not appear to be precluded even outside  
77 subgenera. Several studies have documented the hybridization potential and frequency between  
78 phylogenetically divergent *Amaranthus* species. For instance, the hybridization rate of *A. palmeri*  
79 and *A. tuberculatus*, each members of the two clades of the subgenera *Acnidia*, was observed at  
80 low frequencies both under controlled environments and field conditions (Franssen et al. 2001;  
81 Oliveira et al. 2018). In contrast, hybridization between *A. tuberculatus* and *Amaranthus hybridus*,  
82 a member of the subgenera *Amaranthus* and putative progenitor of the cultivated *Amaranthus*  
83 *hypochondriacus*, was observed at high frequencies under both greenhouse and field conditions

84 (Trucco et al. 2005, 2009). Further observations of interspecific hybridization within *Amaranthus*  
85 are reviewed by Trucco and Tranel (2011).

86

87 A notable gap is observed in the case of the subgenera *Albersia*, to which the weedy species  
88 *Amaranthus albus* is a member (Stetter and Schmid 2017). No interspecific hybridization studies  
89 have been conducted with *Albersia*. However, support for gene flow between members of *Albersia*  
90 and *Acnidia* exist. A survey of resistance to herbicides that inhibit protoporphyrinogen oxidase in  
91 *A. tuberculatus* from five Midwestern states reported alleles of *PPX2* similar to sequences of *A.*  
92 *albus* (Nie et al. 2019). Indeed, both species are regarded as abundant weeds within the surveyed  
93 region. Plants that possessed these sequences were associated with more western sampling  
94 locations and states, where *A. albus* is expected to be more frequent. However, the frequency of  
95 interspecific hybridization between *A. albus* and *A. tuberculatus* is unknown. Here, we report on  
96 the hybridization potential of *A. albus* and *A. tuberculatus* from controlled greenhouse crosses, as  
97 measured through hybridization frequency and hybrid fecundity.

98

99 Materials and Methods

100

101 Population generation

102

103 The *A. tuberculatus* population PI 654437 and an in-house *A. albus* population were selected for  
104 this study. PI6554437 possesses resistance to acetolactate synthase (ALS) inhibitors, a highly  
105 heritable and selectable marker, mediated through a single amino acid substitution (W574L) in  
106 ALS (Patzoldt et al. 2005; Patzoldt and Tranel 2007). The *A. albus* population was phenotypically

107 sensitive to imazethapyr (an ALS-inhibiting herbicide; data not shown). Reciprocal crosses were  
108 conducted between the two populations under Delnet pollen containment tents (SWM, Georgia,  
109 USA) in separate greenhouse rooms during the winter months (to limit the potential for external  
110 pollen contamination). Plants were grown under 12:12 day:night cycle, with temperature ranging  
111 from 28 to 30 C during the day and 25 to 27 C during the night in 1:1:1 soil:peat:torpedo sand mix.  
112 As *A. tuberculatus* is dioecious, pollen competition can be minimized through plant selection.  
113 However, *A. albus* is monoecious and can produce over 100,000 flowers in an indeterminate  
114 fashion; hence, seed collected from *A. albus* plants was produced under a pollen competitive  
115 environment. A total of eight *A. albus* x *A. tuberculatus* crosses were conducted across two  
116 pollination tents to obtain *A. albus* progeny, and four crosses conducted in four tents to obtain *A.*  
117 *tuberculatus* progeny. At maturity, plants were allowed to dry and seed obtained by manual  
118 threshing. To increase germination, seeds were surface sterilized with 50% fresh bleach, washed  
119 with deionized sterile water, and suspended in 0.1% agarose for five weeks at 4 C.

120

121 Hybrid screening

122

123 Putative hybrid identification:

124 Seeds derived from eight *A. albus* plants were screened for resistance to imazethapyr at a density  
125 of 39 viable seeds cm<sup>-2</sup>. Density was determined by seed weight, and the number of viable seeds  
126 was calculated based on percent germination obtained on moistened filter paper in petri dishes.  
127 Seeds were sown in growth medium (1:1:1 mixture of soil, peat, and sand) and 360 g imazethapyr  
128 ha<sup>-1</sup> (Pursuit; BASF) was applied immediately after planting. Applications were made with a  
129 moving-nozzle cabinet spray chamber using an 80015 even flat fan nozzle (TeeJet Technologies),

130 with spray volume calibrated for 187 L ha<sup>-1</sup> applied 46 cm above the soil surface. After herbicide  
131 application, flats were incubated under the same greenhouse conditions described above. Surviving  
132 plants were classified as putative hybrids. Seed derived from *A. tuberculatus* female plants were  
133 classified as putative hybrids because they were produced in tents lacking male *A. tuberculatus*  
134 plants and a strong selectable marker for the *A. albus* parent was not available.

135

#### 136 Hybrid validation

137

138 Putative hybrids were screened with restriction fragment length polymorphisms (RFLPs) that  
139 delimit between *A. albus* and *A. tuberculatus* (Wetzel et al. 1999). The expected digest patterns  
140 for each species and their hybrids are described in Table 1. Briefly, DNA was extracted following  
141 a CTAB procedure and diluted to 50 ng uL<sup>-1</sup> with spectrophotometry (NanoDrop 1000  
142 Spectrophotometer; Thermo Fisher Scientific) (Patzoldt and Tranel 2007). RFLP assay was  
143 conducted following Wetzel et al. (1999), and imaged on a 2% agarose gel stained with GreenGlo  
144 Safe DNA Dye. Banding patterns were assessed visually to validate hybrids.

145

#### 146 Backcross generations

147

148 Validated hybrids were phenotyped and backcrossed to *A. tuberculatus* PI 654437 to test hybrid  
149 fertility. BC<sub>1</sub> plants were grown to the reproductive stage and tissue taken for DNA content  
150 analysis. Three floral branches per individual were harvested and stripped of floral tissue. Nuclei  
151 isolation and flow cytometry were conducted as described by Rayburn et al. (2005) with the  
152 following modifications: maize hybrid VT3 was used as an internal standard for each sample, and

153 peak area was calculated with FCS Express software. Hybrids were phenotyped and fecundity  
154 measured through backcrosses to PI 654437. Fertility was determined through visual observation  
155 of seed production at maturity.

156

## 157 Results

158

### 159 Hybrids from *A. albus* as maternal parent

160

161 Eighty-six thousand seeds by weight equally derived from the eight *A. albus* parent plants were  
162 screened to identify putative hybrids. These populations possessed an average germination  
163 frequency of 75.3%, resulting in nearly 65,000 viable seed screened. A total of 13 survivors from  
164 the imazethapyr application were obtained, and screened with molecular markers. Three of these  
165 13 survivors were identified as true hybrids (Figure 1), resulting in a hybridization frequency of  
166 0.0046%.

167

168 The morphologies of mature hybrids are shown in Supplementary Figure 2. A varying degree of  
169 branching was observed in all cases, perhaps intermediate between the highly branching *A. albus*  
170 and less branching *A. tuberculatus*. In the case of hybrids HY2F and HY3M, branching was  
171 primarily observed once plants became reproductive, while HY1S began branching during  
172 vegetative stages. Stem color, which could delimit between the selected parent plants, was  
173 segregating among hybrids. HY1S and HY3M had white-green stems, similar to the *A. albus*  
174 parent, whereas HY2F had a red stem, similar to PI 654437. Limited to no fertility was observed  
175 in the case of all hybrids. All hybrids were dioecious. Of the two female plants, HY1S was fully



176 sterile and produced no seed. HY2F was mostly sterile, though over 100 seeds were obtained from  
177 backcrosses to PI 654437. HY3M was male, and appeared to dehiscence pollen, though no  
178 backcrosses were conducted due to plant staging errors.

179

180 Similar to the initial hybrids, the BC<sub>1</sub> plants derived from HY2F were dioecious but otherwise  
181 possessed morphological characteristics of both parents, as shown in Supplementary Figure 3. The  
182 BC<sub>1</sub> plants exhibited a higher degree of branching than is typically observed in *A. tuberculatus*.  
183 Curiously, leaves occurred throughout the terminal inflorescence. While this trait is characteristic  
184 of *A. albus*, which possesses no true terminal inflorescence, this was not observed within HY2F.  
185 All plants appeared sterile, or possessed very limited seed set (tens of seed per female). DNA  
186 content analysis revealed that all tested hybrid progeny possessed DNA contents greater than  
187 observed in either parental population (Table 2), though less than expected if HY2F was a  
188 tetraploid.

189

190 Hybrids from *A. tuberculatus* as maternal parent

191

192 Screening of 120 seeds with the RFLP markers from the four *A. tuberculatus* female plants yielded  
193 no confirmed hybrids. Seed production of each plant was minimal, with yields ranging from tens  
194 to low hundreds of seeds produced, whereas tens to hundreds of thousands of seeds are expected  
195 when pollinated by an *A. tuberculatus* male. Progeny were grown to maturity and gender ratios  
196 calculated through visual assessment. Only 16 of the 120 plants were males, whereas progeny from  
197 PI 6354437 exposed to *A. tuberculatus* pollen were equally divided between males and females  
198 (Table 3).

199

200 Discussion

201

202 Three hybrids between *A. albus* and *A. tuberculatus* were successfully identified. The rate of  
203 hybridization (0.0046%) observed within this study is markedly lower than that reported from  
204 other interspecific crosses conducted within the genus. Crosses conducted between representatives  
205 of the two clades of the subgenus *Acnidia*, *A. palmeri* and *A. tuberculatus*, resulted in hybridization  
206 rates of 1% (Franssen et al. 2001). Crosses of *A. tuberculatus* outside of *Acnidia*, to *A. hybridus* of  
207 the *Amaranthus* subgenus, resulted in hybridization rates of 5% (Trucco et al. 2005). Interestingly,  
208 molecular phylogenies place *A. albus* as being more closely related to *A. tuberculatus* than to *A.*  
209 *palmeri* (Stetter and Schmid 2017), and *A. albus* has a matching chromosome number to *A.*  
210 *tuberculatus* ( $2N = 32$ ), while *A. palmeri* does not ( $2N = 34$ ) (Grant 1959). Nevertheless, major  
211 fertility issues were observed both within the initial hybrids as well as in the  $BC_1$  population. These  
212 results suggest that, while the cross can happen, *A. tuberculatus* is not within the primary gene  
213 pool of *A. albus*. Furthermore, flow cytology suggests that elevated DNA content was observed  
214 within the  $BC_1$  population. Perhaps a polyploid state is necessary to produce hybrids between *A.*  
215 *albus* and *A. tuberculatus*. Under the hypothesis that chromosome doubling of at least one set of  
216 gametes is required, the rate of hybridization would be the probability that the gamete is doubled,  
217 and the probability that *A. tuberculatus* will outcompete *A. albus* pollen, resulting in reduced  
218 hybridization frequencies.

219

220 Hybrid plants possessed features of both species, though were most similar to *A. tuberculatus*.

221 Dioecy appears dominant, which is consistent with other interspecific crosses within the genus

222 (Trucco et al. 2005). Apical dominance was observed in all hybrids during the vegetative stage,  
223 though this dominance weakened during the reproductive stage. As such, apical dominance  
224 appears dominant over the extensive lateral branching pattern of *A. albus*, which results in its  
225 “tumbleweed” morphology. Stem color was variable amongst hybrids, an indication that traits  
226 from both parents were expressed within the hybrid plants.

227

228 While theoretically possible, the low frequency of hybridization and the low frequency of  
229 fecundity across multiple generations suggests that *A. albus* is unlikely to contribute adaptive traits  
230 towards the expansion of *A. tuberculatus*. However, herbicide resistance traits could provide a  
231 qualitative fitness advantage to overcome these boundaries within agricultural systems. There is  
232 no reported case of herbicide resistance in *A. albus* within the continental US (Heap 2020). The  
233 origin of the ‘tumble-type’ *PPX2* allele observed by Nie et al. (2019) remains unresolved, but  
234 could indicate that even extremely low rates of hybridization and low viability of hybrids is still  
235 sufficient to allow gene introgression between these two species. Of the member species of  
236 *Albersia*, only *A. albus* and *Amaranthus blitoides* are considered agronomically important weeds  
237 in American Midwest, though neither is noted for herbicide resistance. An alternative is that the  
238 observed allele simply evolved independently within *A. tuberculatus*.

239

240 Screening of progeny derived from *A. tuberculatus* plants did not result in the identification of  
241 hybrids. Similar levels of fecundity were reported in crosses between *A. tuberculatus* and *A.*  
242 *palmeri*, with low hybrid frequency (Franssen et al. 2001). Furthermore, many seeds produced by  
243 Franssen and others were attributed to the rare ‘partially monoecious’ plants observed within their  
244 experiment, hereafter referred to as ‘autopollination’ (Franssen et al. 2001). In *A. tuberculatus*,

245 gender is determined by a single loci, where males are heterogametic (Montgomery et al. 2019).  
246 Therefore, pollen contamination is expected to result in a 1:1 ratio of male to female progeny,  
247 whereas seed derived from autopollination would result in completely female progeny. Indeed, we  
248 observed a skew towards female progeny when *A. tuberculatus* was allowed to cross only with *A.*  
249 *albus* (Table 3). We suspect that male progeny were obtained as a result of pollen contamination.  
250  
251 Apomixis also has been suggested to explain seed production observed in isolated *A. palmeri*  
252 females (Ribeiro et al. 2014). Indeed, apomixis would produce the same gender ratio (all females)  
253 as expected due to autopollination. Dioecy can be viewed as a limiting factor for the colonization  
254 of a new region. As *A. tuberculatus* is noted as an exceptional colonizer, a mechanism to overcome  
255 the limitations of dioecy may not be unexpected. However, the mechanism through which seed  
256 production is mediated is impactful for a developing population. Genetic segregation would be  
257 expected under the autopollination hypothesis, which would result in diverse progeny. In contrast,  
258 each progeny produced through the apomixis hypothesis would be genetically identical. A  
259 mechanism that promotes genetic segregation may be advantageous towards adaptation to new  
260 environments. Indeed, testing these hypotheses is straightforward: a heterozygous marker under  
261 isolation should not segregate under apomixis, but should segregate under autopollination.  
262 Preliminary attempts to identify a heterozygous loci within the selected parent plants of this study  
263 were not successful.

264  
265 There are benefits and costs associated with interspecific hybridization (Chunco 2014). An  
266 invading species can rapidly gain access to adaptation traits to the new habitat, or the mixture  
267 produced could be less fit than either parent. As the range of *A. tuberculatus* continues to expand,

268 fundamental questions remain. Is this expansion, and subsequent displacement of native species,  
269 mediated wholly through the genetic variation within the species, or obtained from outside gene  
270 flow between species? While molecular surveys provide insight into these questions, the  
271 hypotheses must then be experimentally examined. Here, we conclude that hybridization between  
272 *A. tuberculatus* and *A. albus* can happen, though at a notably low frequency in comparison to other  
273 interspecific crosses within the genus. Furthermore, due to sterility or near-sterility observed in  
274 both the initial hybrids and their progeny, widescale introgression of *A. albus* into *A. tuberculatus*  
275 seems unlikely in naturalized conditions. Theoretically, however, herbicide regimes within  
276 production agriculture could generate a sufficient selection pressure for novel herbicide-resistance  
277 traits, driving gene introgression between the species.

278

279 Acknowledgements

280 We thank Dr. A Lane Rayburn for help with flow cytometry.

281

282

283   Declarations

284   Funding

285   No funding was received for conducting this study.

286

287   Conflicts of interest

288   The authors have no relevant financial or non-financial interests to disclose.

289

290   Ethics approval

291   Not applicable.

292

293   Consent to participate

294   Not applicable.

295

296   Consent for publication

297   All authors consent to this research being published.

298

299   Availability of data and material

300   Datasets and material used or generated during the current study are available from the  
301   corresponding author on reasonable request.

302

303   Code availability

304   Not applicable.

305

306 Authors' contributions

307 Patrick J Tranel conceived the study. Material preparation and data collection were performed by

308 Laura A Chatham, Danielle M McCormick, and Brent P Murphy. The first draft of the manuscript

309 was written by Brent P Murphy. All authors read and approved the final manuscript.

310 References

- 311 Arnold ML (2004) Transfer and origin of adaptations through natural hybridization: were  
312 Anderson and Stebbins right? *Plant Cell* 16:562–570
- 313 Benbrook CM (2016) Trends in glyphosate herbicide use in the United States and globally.  
314 *Environ Sci Eur* 28:3
- 315 Chunco AJ (2014) Hybridization in a warmer world. *Ecol Evol* 4:2019–2031
- 316 Costea M, Weaver SE, Tardif FJ (2005) The biology of invasive alien plants in Canada. 3.  
317 *Amaranthus tuberculatus* (Moq.) Sauer var. *rudis* (Sauer) Costea & Tardif. *Can J Plant Sci*  
318 85:507–522
- 319 Culpepper AS, Grey TL, Vencill WK, et al (2006) Glyphosate-resistant Palmer amaranth  
320 (*Amaranthus palmeri*) confirmed in Georgia. *Weed Sci* 54:620–626
- 321 Franssen AS, Skinner DZ, Al-Khatib K, et al (2001) Interspecific hybridization and gene flow of  
322 ALS resistance in *Amaranthus* species. *Weed Sci* 49:598–606
- 323 Grant WF (1959) Cytogenetic studies in *Amaranthus*.: III. Chromosome numbers and phylogenetic  
324 aspects. *Can J Genet Cytol* 1:313–328
- 325 Heap I The International Survey of Herbicide Resistant Weeds. <http://weedsociety.org/>. Accessed  
326 21 May 2020
- 327 Kreiner JM, Giacomini DA, Bemm F, et al (2019) Multiple modes of convergent adaptation in the  
328 spread of glyphosate-resistant *Amaranthus tuberculatus*. *Proc Natl Acad Sci USA*  
329 116:21076–21084
- 330 Milani A, Scarabel L, Sattin M (2020) A family affair: resistance mechanism and alternative  
331 control of three *Amaranthus* species resistant to acetolactate synthase inhibitors in Italy.  
332 *Pest Manag Sci* 76:1205-1213
- 333 Montgomery JS, Sadeque A, Giacomini DA, et al (2019) Sex-specific markers for waterhemp  
334 (*Amaranthus tuberculatus*) and Palmer amaranth (*Amaranthus palmeri*). *Weed Sci* 67:412-  
335 418
- 336 Murphy BP, Larran AS, Ackley B, et al (2019) Survey of glyphosate-, atrazine- and lactofen  
337 resistance mechanisms in Ohio waterhemp (*Amaranthus tuberculatus*) populations. *Weed*  
338 *Sci* 67:296–302
- 339 Nandula VK, Wright AA, Bond JA, et al (2014) EPSPS amplification in glyphosate-resistant spiny  
340 amaranth (*Amaranthus spinosus*): a case of gene transfer via interspecific hybridization  
341 from glyphosate-resistant Palmer amaranth (*Amaranthus palmeri*). *Pest Manag Sci*  
342 70:1902–1909



- 343 Nie H, Mansfield BC, Harre NT, et al (2019) Investigating target-site resistance mechanism to the  
344 PPO-inhibiting herbicide fomesafen in waterhemp and interspecific hybridization of  
345 *Amaranthus* species using next generation sequencing. *Pest Manag Sci* 75:3235-3244
- 346 Oliveira MC, Gaines TA, Patterson EL, et al (2018) Interspecific and intraspecific transference of  
347 metabolism-based mesotrione resistance in dioecious weedy *Amaranthus*. *Plant J* 96:1051–  
348 1063
- 349 Patzoldt WL, Tranel PJ (2007) Multiple ALS mutations confer herbicide resistance in waterhemp  
350 (*Amaranthus tuberculatus*). *Weed Sci* 55:421–428
- 351 Patzoldt WL, Tranel PJ, Hager AG (2005) A waterhemp (*Amaranthus tuberculatus*) biotype with  
352 multiple resistance across three herbicide sites of action. *Weed Sci* 53:30–36
- 353 Rayburn AL, McCloskey R, Tatum TC, et al (2005) Genome size analysis of weedy *Amaranthus*  
354 species. *Crop Sci* 45:2557–2562
- 355 Ribeiro DN, Pan Z, Duke SO, et al (2014) Involvement of facultative apomixis in inheritance of  
356 EPSPS gene amplification in glyphosate-resistant *Amaranthus palmeri*. *Planta* 239:199–  
357 212
- 358 Sauer JD (1967) The grain amaranths and their relatives: A revised taxonomic and geographic  
359 survey. *Ann Mo Bot Gard* 54:103–137
- 360 Steckel LE, Sprague CL, Stoller EW, Wax LM (2004) Temperature effects on germination of nine  
361 *Amaranthus* species. *Weed Sci* 52:217–221
- 362 Stetter MG, Schmid KJ (2017) Analysis of phylogenetic relationships and genome size evolution  
363 of the *Amaranthus* genus using GBS indicates the ancestors of an ancient crop. *Mol*  
364 *Phylogenet Evol* 109:80–92
- 365 Suarez-Gonzalez A, Lexer C, Cronk QCB (2018) Adaptive introgression: a plant perspective. *Biol*  
366 *Lett* 14:20170688
- 367 Tranel PJ, Riggins CW, Bell MS, Hager AG (2011) Herbicide resistances in *Amaranthus*  
368 *tuberculatus*: A call for new options. *J Agric Food Chem* 59:5808–5812
- 369 Trucco F, Jeschke MR, Rayburn AL, Tranel PJ (2005) *Amaranthus hybridus* can be pollinated  
370 frequently by *A. tuberculatus* under field conditions. *Heredity* 94:64–70
- 371 Trucco F, Tatum T, Rayburn AL, Tranel PJ (2009) Out of the swamp: unidirectional hybridization  
372 with weedy species may explain the prevalence of *Amaranthus tuberculatus* as a weed.  
373 *New Phytol* 184:819–827
- 374 Trucco F, Tranel PJ (2011) *Amaranthus*. In: Kole C (ed) *Wild crop relatives: genomic and breeding*  
375 *resources: Vegetables*. Springer, Berlin, Heidelberg, pp 11–21

- 376 Ward SM, Webster TM, Steckel LE (2013) Palmer amaranth (*Amaranthus palmeri*): A review.  
377 Weed Technol 27:12–27
- 378 Wetzel DK, Horak MJ, Skinner DZ (1999) Use of PCR-based molecular markers to identify weedy  
379 *Amaranthus* species. Weed Sci 47:518–523
- 380

381 Figure 1: Confirmation of hybrids using restriction fragment length polymorphisms between the  
382 parental species. Band order: undigested, DdeI, XhoI.

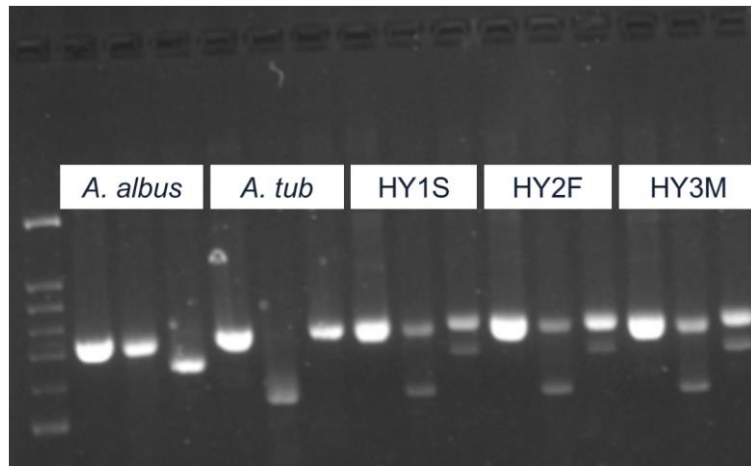

383

384 Table 1: *Amaranthus* species-specific digest patterns for the internal transcribed spacer region (+,  
385 restriction site present; -, restriction site absent).

| Species                | DdeI | XhoI |
|------------------------|------|------|
| <i>A. albus</i>        | -/-  | +/+  |
| <i>A. tuberculatus</i> | +/+  | -/-  |
| Hybrid                 | +/-  | +/-  |

386

387

388 Table 2: DNA content of BC<sub>1</sub> individuals derived from hybrid HY2F x *Amaranthus tuberculatus*.

| Sample                            | pg DNA 2N <sup>-1</sup> |
|-----------------------------------|-------------------------|
| <u>Parent controls</u>            |                         |
| <i>A. albus</i>                   | 1.18                    |
| <i>A. tuberculatus</i>            | 1.42                    |
| <u>BC<sub>1</sub> individuals</u> |                         |
| HY1                               | 1.78                    |
| HY3                               | 1.85                    |
| HY5                               | 1.73                    |

389

390

391 Table 3: Gender ratios of progeny from *Amaranthus tuberculatus* females grown in the presence  
392 of *Amaranthus albus* as a pollen source.

| Female               | Progeny |        | P-value <sup>a</sup> |
|----------------------|---------|--------|----------------------|
|                      | Male    | Female |                      |
| ACR10                | 1       | 5      | 0.102                |
| ACR20                | 9       | 36     | <0.001               |
| ACR3-5               | 2       | 21     | <0.001               |
| ACR3-1               | 4       | 42     | <0.001               |
| Control <sup>b</sup> | 29      | 28     | 0.894                |

393 <sup>a</sup>Chi-square test was conducted against an expected 1:1 male:female ratio.

394 <sup>b</sup>Random subset of progeny of an *A. tuberculatus* x *A. tuberculatus* cross.

395

396 Online appendix items

397

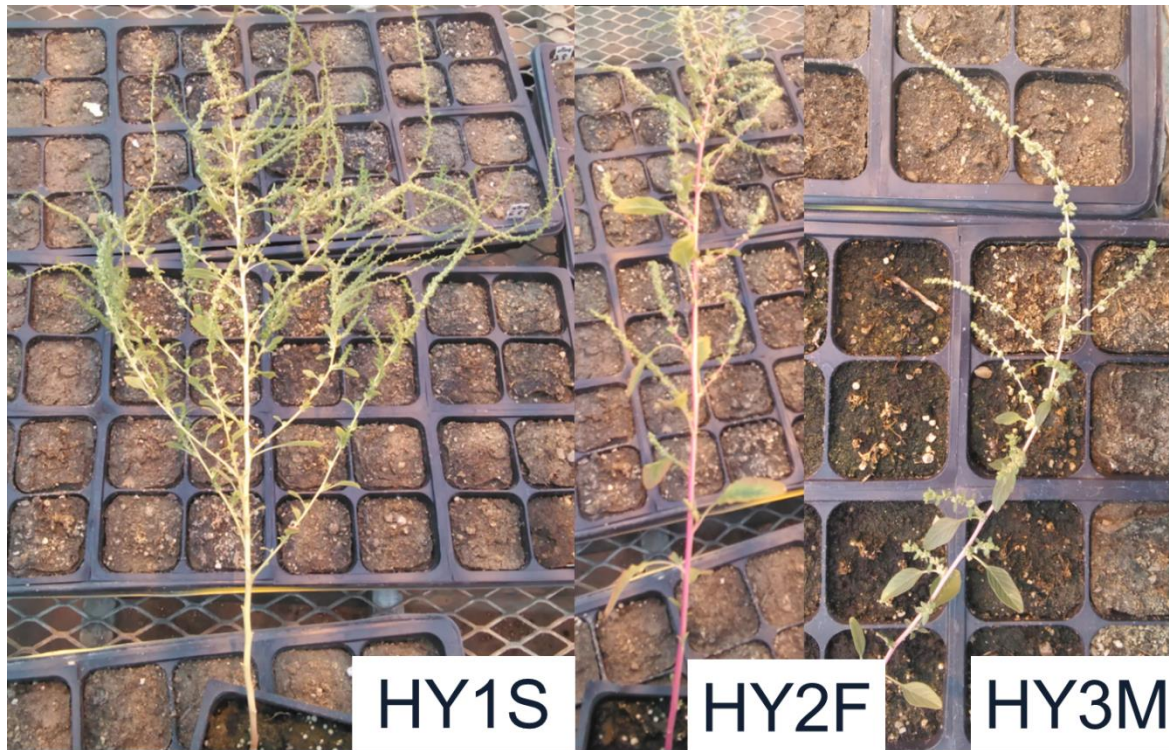

398

399 Supplementary Figure 1: Morphology of *Amaranthus. albus* x *Amaranthus tuberculatus* hybrids.

400

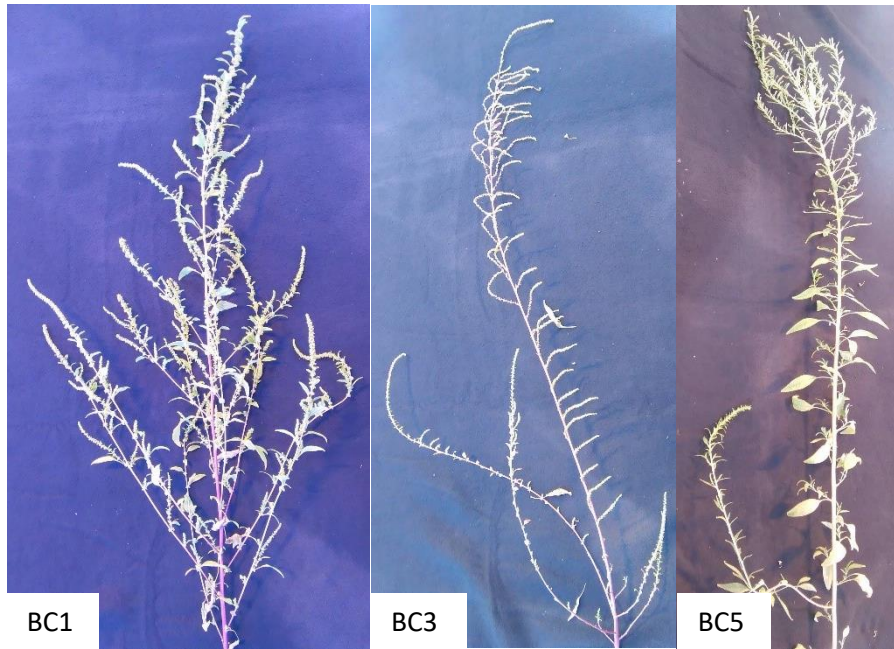

401

402

403 Supplementary Figure 2: Morphology of backcross [HY2F (see Supplementary Figure 1) x

404 *Amaranthus tuberculatus*] progeny. A, HY1; B, HY3; C, HY5.

405
